# Supplementary material
Source: publisher figshare collection journal article supplement (https://tandf.figshare.com/ndownloader/files/37565061)
Supplement: Supplementary file 1 [file 37565061]

xread
235 42
Herrerasaurus	000000000001100000000000000000000100100[0 1]0000000000000000?00000000000000000001000000000000000001000000000000000000[0 1]0001000000000001?00000000?00000000001011000?00000000000010000000000000000000000000000000000000000-000000000000?0000000000
Syntarsus	0000010000100000000000000000000001000000000000000000000000000000000000000001000000000000000000001000000110000100010102110010??100000000010000010000[0 1]0000000011000000000000000110001011101101000100011000100011100000001000100101000?0000000
Dilophosaurus	00000000?000000??000??01000???00020000000000?00000??000??000?0000?0000??????0010000000?1001000?01?0000021100[0 1]000010101100010?0011000?000001000100[0 2]0???00000001000000100000000100000?000?00010??0?0?11000?00000?00000100000001?00000000?0000
Allosaurus	00000100000000000000000010?0000002000010000000000000010000000111010000110101001100000010000000001001110202001000001210000010100001000000000000000000001001000000000010000000-000000[0 1]0000001000101001100000010000001020011101100000000000100
Abelisaurus	1111120?1?011??10111111210?1121101110?000101?11111?1001?111?10???11011??1???1??1?????????101???????????????????????????????????????????????????????????????????????????????????????????????????????????????????????????????????????????????
Aucasaurus	11?112??1?0?11???1??11?2??0??2?0????????????110???1????????????????0??????????????????10??0?????2??????????1??????????1??????????1??[0 1]?1???1021111?1???1??0110?211111111112111001?1??101?21???1121??1?1?0??01?1121111?1?1111??11?11010111111
Arcovenator	?1????????????????0?1111110112?1121101101?0????????????11???11??111111??????????????????1??????????????????????????????????????????????????0[1 2]10????????????????????????????????????????????????????????0??????????1[1 2]11?????????????????????
Berberosaurus	????????????????????????????????????????????????????????????????????????????????????????????????1??????220?000??00???0?[0 1]1???????????[0 1]1?????????????0??????????????????????0??11????????????????????????0100[0 1]1?????10110????????????????????
Carnotaurus	111112111?0111101101111210011211101111011101110111111111110111???100111?111?111111111110?10100012?111112211110111012101000111111111111111111211?1?10110110110021111011111211100111111011211111121?111110?1?1111?????11????1????????????????
CCG_20011	???????????????????????????????????????????????????????????????????????????????????????????????????????110?0111?0?1??211010???0?0000???????0?0???[0 1]?????????????????????????????????????????????????????????????????????????????????????????
Ceratosaurus	00001200100000000100000000001110020100000000000000000000000111?11000011101110011110100100001111121011112210000000[0 1]1210000010?0111100110?1?00001002000000100000011010100000100111[0 1]011101??00000?111101110100[0 1]11111010110111110000100100?????
Dahalokely	???????????????????????????????????????????????????????????????????????????????????????????????1???????2211110101012111000110111111[0 1]???????????????????????????????????????????????????????????????????????????????????????????????????????
Ekrixinatosaurus	1??1?011?001110?????1110?111?2?1?0????1???11???????????1????1??????????????????????11??01?0????1???????222?11?001?1???11?????????1??[0 1]???0?0???111??0??????????????????????????????1?????1????11?1??????1?0011?011111??01??1?0?0????????1???
Elaphrosaurus	???????????????????????????????????????????????????????????????????????????????????????????????1[0 1]??????1100011100110021101011011100011111?01101??1?1??01?01111111111010??10?01????10110110000112?0?00100?11101000012210100100020100????????
Eoabelisaurus	?0????????????????00010000000110020101001000?10?01??0??01?011?????00?1??????????????????00???0?1[1 2]??????221?110?0101?101000100011111011111?1121110200??11100?0000??101[0 1]01011011111111101110[0 1]00?121?-011???01[0 1][0 1]11111111101111??10011000111?01
Genusaurus	????????????????????????????????????????????????????????????????????????????????????????????????1???????2??????0???????????0?????1???1????????????????????????????????????????????11?01??1111??2???????0?0?[0 1]2002?0??11?????????????????????
Genyodectes	0???0?????????????????????????????????????????????????????????????????????????????000?[0 1]?0001111????????????????????????????????????????????????????????????????????????????????????????????????????????????????????????????????????????????
Huinculsaurus	???????????????????????????????????????????????????????????????????????????????????????????????1????????????????????????????01111010?11010?????????????????????????????????????????????????????????????????????????????????????????????????
Ilokelesia	?1?????????????????????????????11101111010?1???????????????????1???????????????????????????????1???????222110010101210110???11?1111?????????2??112?011???????????????????????????????????????????????????????????????????????????????111???
Indosaurus	??????????????????11?1111?0112??????????????????????????????11????11???????????????????????????????????????????????????????????????????????????????????????????????????????????????????????????????????????????????????????????????????????
Kryptops	1????2011?011??????????????????????????????????????????????????????????????????????????01100???????????????????????????????????????????????????????????????????????????????????????????????????????????????????????????????????????????????
Laevisuchus	???????????????????????????????????????????????????????????????????????????????????????????????1??????????01?1?0011?011?00???????[0 1]?????????????????0???????????????????????????????????????????????????????????????????????????????????????
Limusaurus	001?0?0???0?00000?00?00000?0?0000?01[0 1]???00?0?0?0000??????00?????????????????1-?????0?0-1???????1??0?000?2000?11???10?21??0????11????????????10?00?01001110111101??100101?11?[0 1]001110011100[0 1]100001?000?0?????1[1 2]?000????1??1?????20??0??1?????
Majungasaurus	111112011001110101111111101112111011100100011110111101111111111111111111111211111110011011010001211111122111101010121010001011111111[0 1]111111021000210110010010021111111?112111001????101111[0 1]10112?11???11?101???1??1011?1111111001101011111?
Masiakasaurus	00?1?00?111?0?????00000000?????00001000100?0?0010?????????????11?1001???????10?1110000110011?0?12?011112210111100111021000110111101[0 1]10111100111001?011?1?01111111111010????????11011111?11010??21111011011012101??10111111111?21100111101??
Noasaurus	0??1?00111110?0????????????????????????????????????????????0???????????????????????????10011??01[1 2]?????????01?1?101110??00??????????????????????????000???????????????????????????0?????????????????????0???????????????????????1???????????
Pycnonemosaurus	???????????????????????????????????????????????????????????????????????????????????????????????????????????????????????????????????????????111111?0???????????????????????????????????????????????1????1???????2?011???????????????????????
Rahiolisaurus	1?????????????????????????????????????????????????????????????????????????????????????0??001??????1111100[0 1]01?0011?12?0?00???????????111???????????????0???011?????????????????????1??01121010?12?1???0?0?1??11?11?1211?1?11?0001??000??????
Rajasaurus	11????????????????1??1111?0112????????????????????1?????????1111??11???????211????1?0110?101???12????????????????????????011???111??110?11?1???????0??????????????????????????????0???0???110????1????11???1110???1?11?1?????00????0???????
Rugops	111112??1001110111010000110112??????????????11110011??????????????????????????????????101101?0?????????????????????????????????????????????????????0???????????????????????????????????????????????????????????????????????????????????????
Skorpiovenator	11?112111?01111????????01?0??211111110111011011111??11???1??????????????????1??????111?01???0?0??????????[0 1]?1???010?21?11????11??????????????2?111?1?11?????????????????????????????1?011?0110112???1??????011?02?1?1??????????1?11010??1?11
MNN_tig6	???????????????????????????????????????????????????????????????????????????????????????????????11??????2200101[0 1]0010112011010??111100???111?????????000?????????????????????????????????????????????????????????????????????????????????????
Spectrovenator	11???200??0110011101000011?000111[0 1]110000000001110[0 1]1101111111??11010?1111111?1111?1?000?0100?0?0??1?????2??????10?????????01????1?1?????1???????11???11????????????????????????????11?011[1 2]110011?????1?10?0?1???11?10?10111111?10??[0 1]?1111???
Velocisaurus	???????????????????????????????????????????????????????????????????????????????????????????????????????????????????????????????????????????????????????????????????????????????????????????????????????0?111???11?12?1?11111102110111??1?10
Vespersaurus	????????????????????000000?????????????????????????????????????????????????????????????????????11?011?1221011[0 1]1001100210001???1110??101????????0?1?????1?0111?00111001?10????02?10??111???010??2?1?10?10?????????????????????121??11111[0 1]110
Viavenator	????????????????????111010011211101110011101???????????11???11110010???????????????????????????121?????22111101110121011?0??01111111???????0211112?01101101?00???????????????????????????????????????1?????????????????????????????????????
MPCN_PV_69	????1?????????????????????????????????????????????????????????????????????????????????1??101????2????????????????????????????????1????1????1211???????????????2?11??????????????????????????????1??????????????????????????????????1?1?1?11
Afromimus	???????????????????????????????????????????????????????????????????????????????????????????????????????????????????????????????????????????????????????????????????????????????????????????????????????????????0??101111??0?1????????1?????
Xenotarsosaurus	???????????????????????????????????????????????????????????????????????????????????????????????12??????22?????????????????11????11?????????????????????????????????????????????????????????????????????0?01011111111[1 2]10111110??????????????
Llukalkan	11?1?211??0?1??00?011110101112?1111111011111010101?100111??111?111?0?1?11111????????????110????????????????????????????????????????????????????????????????????????????????????????????????????????????????????????????????????????????????
Niebla	???????????????????111121?1?2???????????????????????????????1101110011??????????????????1???????2????????????????????????????????1????????????????????111?1?0??????????????????????????????????????????????????????????????????????????????
Quilmesaurus	???????????????????????????????????????????????????????????????????????????????????????????????????????????????????????????????????????????????????????????????????????????????????????????????????????0????111[1 2]1012????????0??????????????
;

proc /;
comments 0
;
